# Supplementary material for: BRAF-V600E expression in precursor versus differentiated dendritic cells defines clinically distinct LCH risk groups
Source: PubMed Central journal article supplement — J Exp Med. 2014 Apr 7;211(4):669–83. doi: 10.1084/jem.20130977 (PMC3978272; doi:10.1084/jem.20130977), 2014-04-07
Supplement: supp_jem.20130977_JEM_20130977_sm.pdf [file supp_jem.20130977_JEM_20130977_sm.pdf]

## SUPPLEMENTAL MATERIAL

Berres et al., <http://www.jem.org/cgi/content/full/jem.20130977/DC1>**Table S1.** LCH patients: *BRAF-V600E* status and clinical variables

| ID     | BRAF  | Sites                                               | Gender | Age at diagnosis | Risk category | Extent     | Episodes of recurrence | CNS risk | DI  | Peripheral <i>BRAF-V600E</i> detected | Alive | Follow up |
|--------|-------|-----------------------------------------------------|--------|------------------|---------------|------------|------------------------|----------|-----|---------------------------------------|-------|-----------|
|        |       |                                                     |        | yr               |               |            |                        |          |     |                                       |       | yr        |
| LCH002 | V600E | Single bone                                         | M      | 12.7             | Low           | Single     | No                     | No       | No  | Unknown                               | Yes   | 3.6       |
| LCH003 | V600E | Skin, bone, liver, BM, pituitary                    | F      | 1.4              | High          | Multifocal | Yes                    | Yes      | Yes | Yes                                   | Yes   | 6.3       |
| LCH004 | V600E | Single bone                                         | M      | 5.8              | Low           | Single     | Yes                    | No       | No  | Unknown                               | Yes   | 4.8       |
| LCH005 | V600E | Single bone                                         | M      | 7.5              | Low           | Single     | No                     | Yes      | No  | Unknown                               | Yes   | 4.6       |
| LCH007 | V600E | Single bone                                         | M      | 2.8              | Low           | Single     | No                     | No       | No  | No                                    | Yes   | 0.6       |
| LCH008 | V600E | Skin, bone, rectum                                  | M      | 2.7              | Low           | Multifocal | Yes                    | No       | No  | Yes                                   | Yes   | 4.7       |
| LCH009 | V600E | Skin, mastoid, lungs, BM                            | F      | 0.6              | High          | Multifocal | Yes                    | Yes      | No  | Yes                                   | Yes   | 5.8       |
| LCH013 | V600E | Multifocal bone, skin                               | M      | 1.3              | Low           | Multifocal | Yes                    | Yes      | No  | Unknown                               | Yes   | 8.7       |
| LCH014 | V600E | Scalp, multifocal bone, skin, spleen, LN, liver, BM | M      | 1.2              | High          | Multifocal | Yes                    | Yes      | No  | Yes                                   | Yes   | 7.0       |
| LCH015 | V600E | Multifocal bone                                     | F      | 7.2              | Low           | Multifocal | No                     | No       | No  | Unknown                               | Yes   | 5.9       |
| LCH017 | V600E | Single bone                                         | M      | 5.9              | Low           | Single     | No                     | No       | No  | No                                    | Yes   | 5.3       |
| LCH018 | V600E | Skin, multifocal bone, spleen, liver, BM            | M      | 0.5              | High          | Multifocal | Yes                    | Yes      | No  | Yes                                   | No    | 2.0       |
| LCH019 | V600E | Single bone                                         | F      | 0.9              | Low           | Single     | Yes                    | Yes      | No  | No                                    | Yes   | 5.4       |
| LCH020 | V600E | Skin, BM, liver, spleen                             | M      | 1.8              | High          | Multifocal | Yes                    | No       | No  | Yes                                   | No    | 1.3       |
| LCH021 | V600E | Skin, bone                                          | M      | 0.8              | Low           | Multifocal | Yes                    | Yes      | No  | Yes                                   | Yes   | 5.5       |
| LCH022 | V600E | Single bone                                         | M      | 14.0             | Low           | Single     | No                     | No       | No  | No                                    | Yes   | 0.3       |
| LCH023 | V600E | Multifocal bone, skin, oral mucosa                  | M      | 1.8              | Low           | Multifocal | No                     | No       | No  | Yes                                   | Yes   | 4.1       |
| LCH025 | V600E | Multifocal bone                                     | M      | 0.9              | Low           | Multifocal | Yes                    | Yes      | No  | Unknown                               | Yes   | 1.6       |
| LCH026 | V600E | Single bone                                         | M      | 7.7              | Low           | Single     | No                     | No       | No  | No                                    | Yes   | 4.8       |
| LCH029 | V600E | Single bone                                         | M      | 6.0              | Low           | Single     | Unknown                | No       | No  | No                                    | Yes   | 0.0       |
| LCH030 | V600E | Multifocal bone, pituitary                          | M      | 2.0              | Low           | Multifocal | Yes                    | Yes      | Yes | Yes                                   | Yes   | 5.0       |
| LCH032 | V600E | Single bone                                         | M      | 3.7              | Low           | Single     | No                     | Yes      | No  | No                                    | Yes   | 4.5       |
| LCH034 | V600E | Single bone                                         | M      | 12.6             | Low           | Single     | No                     | No       | No  | Unknown                               | Yes   | 4.3       |
| LCH035 | V600E | Single bone                                         | M      | 13.3             | Low           | Single     | No                     | No       | No  | No                                    | Yes   | 0.3       |
| LCH036 | V600E | Skin, oral mucosa, pituitary                        | M      | 0.6              | Low           | Multifocal | Yes                    | Yes      | Yes | No                                    | Yes   | 4.7       |
| LCH037 | V600E | Multifocal bone                                     | F      | 7.8              | Low           | Multifocal | No                     | No       | No  | No                                    | Yes   | 0.3       |
| LCH040 | V600E | Skin, LN, BM                                        | F      | 0.8              | High          | Multifocal | Yes                    | No       | No  | Yes                                   | No    | 3.1       |
| LCH044 | V600E | Multifocal bone, pituitary                          | M      | 3.0              | Low           | Multifocal | No                     | Yes      | Yes | No                                    | Yes   | 2.3       |
| LCH047 | V600E | Single bone                                         | F      | 5.0              | Low           | Single     | Yes                    | No       | No  | No                                    | Yes   | 1.5       |
| LCH048 | V600E | Bone, skin                                          | F      | 16.0             | Low           | Multifocal | No                     | No       | No  | No                                    | Yes   | 0.9       |
| LCH049 | V600E | Multifocal bone                                     | M      | 11.9             | Low           | Multifocal | No                     | No       | No  | No                                    | Yes   | 1.3       |
| LCH050 | V600E | Single bone                                         | M      | 7.9              | Low           | Single     | No                     | Yes      | No  | No                                    | Yes   | 0.8       |
| LCH053 | V600E | Single bone                                         | M      | 7.8              | Low           | Single     | No                     | No       | No  | No                                    | Yes   | 3.9       |

**Table S1.** LCH patients: *BRAF-V600E* status and clinical variables (*Continued*)

| ID          | BRAF  | Sites                                                | Gender | Age at diagnosis | Risk category | Extent     | Episodes of recurrence | CNS risk | DI  | Peripheral <i>BRAF-V600E</i> detected | Alive | Follow up |
|-------------|-------|------------------------------------------------------|--------|------------------|---------------|------------|------------------------|----------|-----|---------------------------------------|-------|-----------|
| LCH054      | V600E | Multifocal bone                                      | M      | 18.7             | Low           | Multifocal | Yes                    | No       | No  | Unknown                               | Yes   | 3.7       |
| LCH055      | V600E | Single bone                                          | M      | 8.7              | Low           | Single     | No                     | No       | No  | No                                    | Yes   | 1.5       |
| LCH058      | V600E | Single bone                                          | M      | 8.9              | Low           | Single     | No                     | No       | No  | No                                    | Yes   | 1.4       |
| LCH059      | V600E | Single bone                                          | M      | 6.0              | Low           | Single     | No                     | No       | No  | Unknown                               | Yes   | 1.5       |
| LCH060      | V600E | Single bone                                          | M      | 10.4             | Low           | Single     | No                     | No       | No  | Unknown                               | Yes   | 1.1       |
| LCH061      | V600E | Single bone                                          | M      | 2.9              | Low           | Single     | No                     | Yes      | No  | Unknown                               | Yes   | 2.8       |
| LCH062      | V600E | Multifocal bone                                      | F      | 0.6              | Low           | Multifocal | Yes                    | Yes      | No  | No                                    | Yes   | 2.6       |
| LCH063      | V600E | Multifocal bone                                      | F      | 3.0              | Low           | Multifocal | Yes                    | No       | No  | No                                    | Yes   | 2.6       |
| LCH066      | V600E | Skin, multifocal bone, oral mucosa, genital mucosa   | F      | 47.3             | Low           | Multifocal | Yes                    | No       | No  | Unknown                               | Yes   | 9.3       |
| LCH067      | V600E | Skin, bone, BM, liver, oral mucosa                   | F      | 1.9              | High          | Multifocal | Yes                    | Yes      | No  | Yes                                   | Yes   | 2.5       |
| LCH068      | V600E | Skin, bone                                           | M      | 0.5              | Low           | Multifocal | Yes                    | Yes      | No  | Yes                                   | Yes   | 2.3       |
| LCH069      | V600E | Multifocal bone                                      | M      | 1.8              | Low           | Multifocal | Yes                    | Yes      | No  | No                                    | Yes   | 1.8       |
| LCH070      | V600E | Skin, multifocal bone, liver, oral mucosa            | F      | 0.3              | High          | Multifocal | No                     | Yes      | No  | Yes                                   | Yes   | 2.2       |
| LCH072      | V600E | Multifocal bone                                      | M      | 3.1              | Low           | Multifocal | No                     | Yes      | No  | No                                    | Yes   | 1.6       |
| LCH074      | V600E | Multifocal bone                                      | M      | 2.2              | Low           | Multifocal | Yes                    | Yes      | No  | No                                    | Yes   | 1.8       |
| LCH075      | V600E | Skin, bone, liver, BM, lungs                         | M      | 0.7              | High          | Multifocal | Yes                    | Yes      | No  | Yes                                   | Yes   | 1.7       |
| LCH077      | V600E | Skin, liver                                          | F      | 0.7              | High          | Multifocal | Yes                    | No       | No  | Yes                                   | Yes   | 1.3       |
| LCH078      | V600E | Multifocal bone                                      | M      | 3.8              | Low           | Multifocal | Yes                    | Yes      | Yes | Unknown                               | Yes   | 9.0       |
| LCH080      | V600E | Skin, bone, spleen, liver, oral mucosa, lungs        | F      | 1.1              | High          | Multifocal | Yes                    | Yes      | No  | Yes                                   | Yes   | 1.5       |
| LCH082      | V600E | Single bone                                          | F      | 3.6              | Low           | Single     | No                     | No       | No  | No                                    | Yes   | 1.0       |
| LCH085      | V600E | Single bone                                          | F      | 9.0              | Low           | Single     | No                     | No       | No  | No                                    | Yes   | 0.7       |
| LCH087      | V600E | Multifocal bone                                      | M      | 7.1              | Low           | Multifocal | No                     | No       | No  | No                                    | Yes   | 0.9       |
| LCH088      | V600E | Single bone                                          | M      | 5.7              | Low           | Single     | No                     | No       | No  | No                                    | Yes   | 0.8       |
| LCH089      | V600E | Single bone                                          | F      | 7.2              | Low           | Single     | No                     | Yes      | No  | No                                    | Yes   | 0.9       |
| LCH091      | V600E | Multifocal bone                                      | F      | 2.5              | Low           | Multifocal | Yes                    | No       | No  | No                                    | Yes   | 9.3       |
| LCH092      | V600E | Single bone                                          | F      | 3.1              | Low           | Single     | No                     | No       | No  | No                                    | Yes   | 0.8       |
| LCH093      | V600E | Single bone                                          | M      | 0.9              | Low           | Single     | No                     | Yes      | No  | No                                    | Yes   | 0.7       |
| LCH094      | V600E | Single bone                                          | M      | 11.7             | Low           | Single     | No                     | No       | No  | No                                    | Yes   | 0.4       |
| LCH095      | V600E | Skin, bone                                           | F      | 10.7             | Low           | Multifocal | Yes                    | No       | No  | No                                    | Yes   | 0.3       |
| LCH-JXG-099 | V600E | Skin, LN, lungs, liver, spleen, kidney, BM (JXG/LCH) | F      | 2.6              | High          | Multifocal | Yes                    | No       | No  | Yes                                   | Yes   | 0.8       |
| LCH-ECD-100 | V600E | Multifocal bone, lungs (ECD/LCH)                     | F      | 36.4             | Low           | Multifocal | Yes                    | Yes      | Yes | No                                    | Yes   | 7.9       |
| LCH001      | WT    | Multifocal bone                                      | F      | 1.7              | Low           | Multifocal | Yes                    | No       | No  | Unknown                               | Yes   | 6.3       |
| LCH006      | WT    | Single bone                                          | F      | 2.3              | Low           | Single     | No                     | No       | No  | Unknown                               | Yes   | 2.8       |
| LCH010      | WT    | Single bone                                          | F      | 5.4              | Low           | Single     | No                     | No       | No  | No                                    | Yes   | 4.2       |
| LCH011      | WT    | Single bone                                          | F      | 6.2              | Low           | Single     | No                     | No       | No  | No                                    | Yes   | 4.9       |
| LCH012      | WT    | Multifocal bone                                      | M      | 11.9             | Low           | Multifocal | No                     | No       | No  | No                                    | Yes   | 4.6       |
| LCH016      | WT    | Single bone                                          | M      | 9.0              | Low           | Single     | No                     | No       | No  | Unknown                               | Yes   | 5.3       |
| LCH024      | WT    | Skin, bone                                           | F      | 4.9              | Low           | Single     | No                     | No       | No  | Unknown                               | Yes   | 4.3       |
| LCH027      | WT    | Single bone                                          | M      | 7.5              | Low           | Single     | No                     | No       | No  | No                                    | Yes   | 0.8       |

**Table S1.** LCH patients: *BRAF-V600E* status and clinical variables (*Continued*)

| ID          | BRAF | Sites                                   | Gender | Age at diagnosis | Risk category | Extent     | Episodes of recurrence | CNS risk | DI  | Peripheral <i>BRAF-V600E</i> detected | Alive Follow up |     |
|-------------|------|-----------------------------------------|--------|------------------|---------------|------------|------------------------|----------|-----|---------------------------------------|-----------------|-----|
| LCH028      | WT   | LN, spleen, lungs, intestine            | M      | 11.6             | High          | Multifocal | Yes                    | No       | No  | No                                    | No              | 2.0 |
| LCH031      | WT   | Single bone                             | M      | 0.9              | Low           | Single     | No                     | Yes      | No  | No                                    | Yes             | 3.6 |
| LCH033      | WT   | Mastoid, pituitary, lungs               | F      | 2.3              | Low           | Multifocal | No                     | Yes      | No  | Unknown                               | Yes             | 4.4 |
| LCH038      | WT   | Skin, bone, lungs                       | F      | 3.5              | Low           | Multifocal | Yes                    | No       | No  | No                                    | Yes             | 4.1 |
| LCH039      | WT   | Skin, liver, spleen, LN, BM             | M      | 1.0              | High          | Multifocal | Yes                    | No       | No  | Unknown                               | No              | 1.3 |
| LCH041      | WT   | Skin, liver, BM                         | F      | 0.3              | High          | Multifocal | No                     | No       | No  | No                                    | Yes             | 3.7 |
| LCH042      | WT   | Single bone                             | M      | 6.1              | Low           | Single     | No                     | No       | No  | No                                    | Yes             | 2.9 |
| LCH043      | WT   | Multifocal bone                         | F      | 10.7             | Low           | Multifocal | No                     | No       | No  | No                                    | Yes             | 4.6 |
| LCH045      | WT   | Skin, LN, lungs, liver, multifocal bone | F      | 0.5              | High          | Multifocal | Yes                    | Yes      | No  | No                                    | Yes             | 2.8 |
| LCH046      | WT   | Nasal mucosa, pituitary, brain          | M      | 5.8              | Low           | Multifocal | Yes                    | Yes      | Yes | No                                    | Yes             | 4.2 |
| LCH051      | WT   | Multifocal bone                         | M      | 1.7              | Low           | Multifocal | Yes                    | Yes      | No  | Unknown                               | Yes             | 8.3 |
| LCH052      | WT   | Multifocal bone                         | F      | 2.3              | Low           | Multifocal | No                     | No       | No  | Unknown                               | Yes             | 4.4 |
| LCH056      | WT   | Single bone                             | M      | 1.9              | Low           | Single     | No                     | Yes      | No  | No                                    | Yes             | 1.2 |
| LCH057      | WT   | Multifocal bone                         | M      | 1.2              | Low           | Multifocal | Yes                    | No       | No  | No                                    | Yes             | 3.3 |
| LCH064      | WT   | Single bone                             | M      | 7.9              | Low           | Single     | No                     | No       | No  | No                                    | Yes             | 2.6 |
| LCH065      | WT   | Single bone                             | F      | 7.7              | Low           | Single     | No                     | Yes      | No  | No                                    | Yes             | 2.1 |
| LCH071      | WT   | Skull,                                  | M      | 3.0              | Low           | Single     | No                     | Yes      | No  | Unknown                               | Yes             | 1.8 |
| LCH073      | WT   | Bone, BM, LN, liver                     | F      | 0.7              | High          | Multifocal | Yes                    | Yes      | No  | No                                    | No              | 0.1 |
| LCH076      | WT   | Single bone                             | M      | 16.1             | Low           | Single     | No                     | No       | No  | Unknown                               | Yes             | 0.7 |
| LCH079      | WT   | Multifocal bone                         | M      | 7.9              | Low           | Multifocal | No                     | No       | No  | No                                    | Yes             | 1.3 |
| LCH081      | WT   | Single bone                             | F      | 0.8              | Low           | Single     | No                     | No       | No  | No                                    | Yes             | 1.2 |
| LCH083      | WT   | Multifocal bone                         | F      | 2.9              | Low           | Multifocal | No                     | Yes      | No  | No                                    | Yes             | 1.1 |
| LCH084      | WT   | Lungs, pituitary                        | M      | 16.4             | Low           | Multifocal | No                     | Yes      | Yes | No                                    | Yes             | 1.0 |
| LCH086      | WT   | Single bone                             | F      | 14.9             | Low           | Single     | No                     | No       | No  | No                                    | Yes             | 0.7 |
| LCH090      | WT   | Single bone                             | M      | 5.7              | Low           | Single     | No                     | No       | No  | No                                    | Yes             | 0.3 |
| LCH096      | WT   | Single bone                             | F      | 4.5              | Low           | Single     | No                     | No       | No  | No                                    | Yes             | 0.2 |
| LCH097      | WT   | Single bone                             | M      | 4.6              | Low           | Single     | No                     | Yes      | No  | No                                    | Yes             | 0.2 |
| LCH-JXG-098 | WT   | Multifocal bone (LCH/JXG)               | M      | 6.7              | Low           | Multifocal | Yes                    | No       | No  | No                                    | Yes             | 4.7 |

**Table S2.** LCH lesions: cell-specific *BRAF-V600E* status

| Lesion ID | Diagnosis | Location         | BRAF genotype | qPCR<br>% <i>V600E</i> | Sanger lesion CD207 | Sanger lesion CD3 | Days from diagnosis |
|-----------|-----------|------------------|---------------|------------------------|---------------------|-------------------|---------------------|
| 1A.1      | LCH       | Pelvis           | WT            | 0                      |                     |                   | 0                   |
| 2A.1      | LCH       | Skull (parietal) | V600E         | 8.6                    |                     |                   | 313                 |
| 3A.1      | LCH       | Orbit            | V600E         | 17.5*                  | V600E               |                   | 280                 |
| 4A.1      | LCH       | Pelvis           | V600E         | 11.9                   |                     |                   | 0                   |
| 5A.1      | LCH       | Skull (mastoid)  | V600E         | 8.4                    |                     |                   | 0                   |
| 6A.1      | LCH       | Skull (parietal) | WT            | 0                      | WT                  |                   | 0                   |
| 7A.1      | LCH       | Skull (parietal) | V600E         | 9.3                    | V600E               |                   | 0                   |
| 8A.1      | LCH       | Skin             | V600E         | 0.3                    |                     |                   | 0                   |
| 9A.1      | LCH       | Mastoid          | V600E         | 36.6                   | V600E               |                   | 0                   |
| 9A.2      | LCH       | Mastoid          | V600E         | 15.0*                  | V600E               |                   | 96                  |
| 9A.3      | LCH       | Gingiva          | V600E         | 0.7                    |                     |                   | 127                 |
| 9A.4      | LCH       | BM               | V600E         | 1.0                    |                     |                   | 170                 |
| 10A.1     | LCH       | Pelvis           | WT            | 0*                     | WT                  |                   | 0                   |
| 11A.1     | LCH       | Skull (parietal) | WT            | 0                      | WT                  | WT                | 0                   |
| 12A.1     | LCH       | Pelvis           | WT            | 0*                     | WT                  |                   | 0                   |
| 13A.1     | LCH       | Skull (parietal) | V600E         | 7.5                    |                     |                   | 0                   |
| 13A.2     | LCH       | Scalp            | V600E         | 2.8*                   |                     |                   | 345                 |
| 14A.1     | LCH       | Liver            | V600E         | 20.3                   |                     |                   | 686                 |
| 15A.1     | LCH       | Skull (frontal)  | V600E         | 11.9                   |                     |                   | 0                   |
| 16A.1     | LCH       | Skull (parietal) | WT            | 0                      |                     |                   | 0                   |
| 17A.1     | LCH       | Skull (frontal)  | V600E         | NA                     | V600E               |                   | 0                   |
| 18A.1     | LCH       | Spleen           | V600E         | 6.9                    |                     |                   | 693                 |
| 19A.1     | LCH       | Mastoid          | V600E         | NA                     | V600E               | WT                | 0                   |
| 19A.2     | LCH       | Mastoid          | V600E         | 2.3                    |                     |                   | 216                 |
| 20A.1     | LCH       | Skin             | V600E         | 5.4*                   | V600E               |                   | 0                   |
| 21A.1     | LCH       | Orbit            | V600E         | 74.5*                  | WT                  | WT                | 0                   |
| 22A.1     | LCH       | Skull            | V600E         | 19.4*                  | V600E               | WT                | 0                   |
| 23A.1     | LCH       | Mandible         | V600E         | NA                     | V600E               | WT                | 0                   |
| 24A.1     | LCH       | Skin             | WT            | 0                      | WT                  | WT                | 0                   |
| 25A.1     | LCH       | Mastoid          | V600E         | 23.4                   | V600E               |                   | 574                 |
| 26A.1     | LCH       | Parietal         | V600E         | 3.6                    | V600E               |                   | 0                   |
| 27A.1     | LCH       | Skin             | WT            | 0                      | WT                  | WT                | 0                   |
| 28A.1     | LCH       | LN               | WT            | 0                      |                     |                   | 536                 |
| 28A.2     | LCH       | LN               | WT            | 0                      |                     |                   | 610                 |
| 29A.1     | LCH       | Skull (frontal)  | V600E         | 11.8                   | V600E               |                   | 0                   |
| 30A.1     | LCH       | Occipital skull  | V600E         | 11.4                   | V600E               |                   | 0                   |
| 30A.2     | LCH       | Femur            | V600E         | 19.2                   | V600E               |                   | 109                 |
| 31A.1     | LCH       | Orbit            | WT            | 0                      | WT                  |                   | 0                   |
| 32A.1     | LCH       | Orbit            | V600E         | 1.8                    |                     |                   | 0                   |
| 33A.1     | LCH       | Skull (mastoid)  | WT            | 0                      |                     |                   | 0                   |
| 34A.1     | LCH       | Vertebra         | V600E         | 7.2                    |                     |                   | 0                   |
| 35A.1     | LCH       | Rib              | V600E         | 2.8                    |                     |                   | 0                   |
| 36A.1     | LCH       | Skin             | V600E         | 8.5                    |                     |                   | 0                   |
| 37A.1     | LCH       | Skull (frontal)  | V600E         | 20                     | V600E               |                   | 0                   |
| 38A.1     | LCH       | Skin             | WT            | 0                      | WT                  |                   | 366                 |
| 38A.2     | LCH       | Lung             | WT            | 0                      |                     |                   | 1,500               |
| 39A.1     | LCH       | Spleen           | WT            | 0                      |                     |                   | 324                 |
| 40A.1     | LCH       | BM               | V600E         | 0.1                    |                     |                   | 959                 |
| 40A.2     | LCH       | Ilium            | V600E         | 31.1                   |                     |                   | 1,081               |
| 40B.2     | LCH       | Femur (right)    | V600E         | 26.4                   |                     |                   | 1,081               |

**Table S2.** LCH lesions: cell-specific *BRAF-V600E* status (Continued)

| Lesion ID | Diagnosis | Location                 | BRAF genotype | qPCR | Sanger lesion CD207 | Sanger lesion CD3 | Days from diagnosis |
|-----------|-----------|--------------------------|---------------|------|---------------------|-------------------|---------------------|
| 40C.2     | LCH       | Femur (left)             | V600E         | 61.1 |                     |                   | 1,081               |
| 41A.1     | LCH       | BM                       | WT            | 0    |                     |                   | 0                   |
| 42A.1     | LCH       | Skull (occipital)        | WT            | 0    | WT                  |                   | 0                   |
| 43A.1     | LCH       | Rib                      | WT            | 0    | WT                  |                   | 0                   |
| 44A.1     | LCH       | Skull (temporal)         | V600E         | 15.4 | V600E               |                   | 0                   |
| 45A.1     | LCH       | BM                       | WT            | 0    |                     |                   | 1                   |
| 45A.2     | LCH       | LN                       | WT            | 0    | WT                  |                   | 15                  |
| 46A.1     | LCH       | Nasal mucosa             | WT            | 0    | WT                  |                   | 0                   |
| 47A.1     | LCH       | Femur                    | V600E         | NA   | V600E               |                   | 0                   |
| 48A.1     | LCH       | Skull (parietal)         | V600E         | 31.2 | V600E               |                   | 0                   |
| 49A.1     | LCH       | Skull (frontal)          | V600E         | 5.7  | V600E               |                   | 82                  |
| 50A.1     | LCH       | Radius                   | V600E         | 16.9 | V600E               |                   | 0                   |
| 51A.1     | LCH       | Skull (frontal)          | WT            | 0    |                     |                   | 0                   |
| 52A.1     | LCH       | Femur                    | WT            | 0    |                     |                   | 0                   |
| 53A.1     | LCH       | Femur                    | V600E         | 19.4 | V600E               |                   | 0                   |
| 54A.1     | LCH       | Clavicle                 | V600E         | 19.9 | V600E               |                   | 0                   |
| 55A.1     | LCH       | Femur                    | V600E         | 2.6  | V600E               |                   | 0                   |
| 56A.1     | LCH       | Orbit                    | WT            | 0    | WT                  |                   | 0                   |
| 57A.1     | LCH       | Skull (frontal)          | WT            | 0    | WT                  |                   | 0                   |
| 57A.2     | LCH       | Rib                      | WT            | 0    | WT                  |                   | 887                 |
| 58A.1     | LCH       | Skull (parietal)         | V600E         | 1    | V600E               |                   | 0                   |
| 59A.1     | LCH       | Skull (frontal)          | V600E         | 4    | V600E               |                   | 0                   |
| 60A.1     | LCH       | Skull (frontal)          | V600E         | 2.5  | V600E               |                   | 0                   |
| 61A.1     | LCH       | Orbit                    | V600E         | 38   | V600E               |                   | 0                   |
| 62A.1     | LCH       | Skull (parietal)         | V600E         | 22.7 | V600E               |                   | 0                   |
| 62A.2     | LCH       | Mastoid                  | V600E         | 29.1 |                     |                   | 466                 |
| 63A.1     | LCH       | Ilium                    | V600E         | 6.2  | V600E               |                   | 0                   |
| 64A.1     | LCH       | Vertebra                 | WT            | 0*   | WT                  |                   | 0                   |
| 65A.1     | LCH       | Orbit                    | WT            | 0    | WT                  |                   | 0                   |
| 66A.1     | LCH       | Clavicle                 | V600E         | NA   | V600E               |                   | 3,370               |
| 67A.1     | LCH       | BM                       | V600E         | 2.1  |                     |                   | 0                   |
| 67A.2     | LCH       | BM                       | V600E         | 0.15 |                     |                   | 65                  |
| 67A.3     | LCH       | BM                       | V600E         | 0.02 |                     |                   | 121                 |
| 68A.1     | LCH       | BM                       | V600E         | 2.2  |                     |                   | 14                  |
| 68A.2     | LCH       | BM                       | V600E         | 1.1  |                     |                   | 61                  |
| 68A.3     | LCH       | Orbit                    | V600E         | 18.4 |                     |                   | 404                 |
| 69A.1     | LCH       | Skull (occipital)        | V600E         | 10.4 | V600E               |                   | 0                   |
| 70A.1     | LCH       | BM                       | V600E         | 0.1  |                     |                   | 31                  |
| 71A.1     | LCH       | Skull (orbit)            | WT            | 0    |                     |                   | 0                   |
| 72A.1     | LCH       | Skull (right-parietal)   | V600E         | 1.1  | V600E               |                   | 0                   |
| 72B.1     | LCH       | Skull (midline-parietal) | V600E         | 1.7  | V600E               |                   | 0                   |
| 72C.1     | LCH       | Skull (left-parietal)    | V600E         | 1.3  | V600E               |                   | 0                   |
| 73A.1     | LCH       | LN                       | WT            | 0    |                     |                   | 0                   |
| 74A.1     | LCH       | Skull (mastoid)          | V600E         | 9.0  |                     |                   | 558                 |
| 75A.1     | LCH       | Skin                     | V600E         | NA   | V600E               |                   | 0                   |
| 75A.2     | LCH       | Liver                    | V600E         | 9.1  | V600E               |                   | 8                   |
| 75A.3     | LCH       | BM                       | V600E         | 0.18 |                     |                   | 8                   |
| 75B.1     | LCH       | Liver                    | V600E         | 0.76 |                     |                   | 43                  |
| 75C.1     | LCH       | BM                       | V600E         | 0.07 |                     |                   | 116                 |
| 75D.1     | LCH       | Liver                    | V600E         | 0.04 |                     |                   | 193                 |

**Table S2.** LCH lesions: cell-specific *BRAF-V600E* status (Continued)

| Lesion ID | Diagnosis        | Location                                | BRAF genotype | qPCR | Sanger lesion CD207 | Sanger lesion CD3 | Days from diagnosis |
|-----------|------------------|-----------------------------------------|---------------|------|---------------------|-------------------|---------------------|
| 75E.1     | LCH              | Liver<br>(no residual LCH by histology) | WT            | 0    |                     |                   | 253                 |
| 76A.1     | LCH              | Skull (frontal)                         | WT            | 0    |                     |                   | 0                   |
| 77A.1     | LCH              | Skin                                    | V600E         | 2.2  |                     |                   | 0                   |
| 78A.1     | LCH              | Skull (temporal)                        | V600E         | 20   |                     |                   | 0                   |
| 79A.1     | LCH              | Femur                                   | WT            | 0    |                     |                   | 489                 |
| 80A.1     | LCH              | LN                                      | V600E         | 8.7  |                     |                   | 195                 |
| 81A.1     | LCH              | Femur                                   | WT            | 0    |                     |                   | 0                   |
| 82A.1     | LCH              | Skull (parietal)                        | V600E         | 2.6  |                     |                   | 0                   |
| 83A.1     | LCH              | Skull (parietal)                        | WT            | 0    |                     |                   | 0                   |
| 84A.1     | LCH              | Lung                                    | WT            | 0    |                     |                   | 0                   |
| 84A.2     | LCH              | Lung                                    | WT            | 0    |                     |                   | 0                   |
| 85A.1     | LCH              | Skull (parietal)                        | V600E         | 0.2  |                     |                   | 0                   |
| 86A.1     | LCH              | Skull (parietal)                        | WT            | 0    |                     |                   | 0                   |
| 87A.1     | LCH              | Skull (frontal)                         | V600E         | 6.3  |                     |                   | 0                   |
| 88A.1     | LCH              | Skull (parietal)                        | V600E         | 30.8 |                     |                   | 0                   |
| 89A.1     | LCH              | Orbit                                   | V600E         | 16.2 |                     |                   | 0                   |
| 90A.1     | LCH              | Femur                                   | WT            | 0    |                     |                   | 0                   |
| 91A.1     | LCH              | Skull (frontal)                         | V600E         | 32.4 |                     |                   | 0                   |
| 92A.1     | LCH              | Scapula                                 | V600E         | 26.7 |                     |                   | 0                   |
| 93A.1     | LCH              | Mastoid                                 | V600E         | 24.8 |                     |                   | 0                   |
| 94A.1     | LCH              | Scapula                                 | V600E         | 21.7 |                     |                   | 0                   |
| 95A.1     | LCH              | Skull (parietal)                        | V600E         | 4.7  |                     |                   | 0                   |
| 96A.1     | LCH              | Ischium                                 | WT            | 0    |                     |                   | 0                   |
| 97A.1     | LCH              | Orbit                                   | WT            | 0    |                     |                   | 0                   |
| 98A.1     | JXG/LCH (mixed)  | Skull (parietal)                        | WT            | 0    |                     |                   | 1,291               |
| 99A.1     | JXG/LCH (mixed)  | Skin                                    | V600E         | 0.4  |                     |                   | 0                   |
| 99A.2     | JXG/LCH (mixed)  | LN                                      | V600E         | 6.7  |                     |                   | 0                   |
| 99A.3     | JXG              | BM                                      | V600E         | 0.4  |                     |                   | 7                   |
| 99A.4     | JXG              | BM                                      | V600E         | 0.03 |                     |                   | 53                  |
| 100A.1    | ECD/LCH (serial) | Skull (LCH)                             | V600E         | 15.8 |                     |                   | 2932                |

\*, gDNA isolated from FFPE biopsy. Sample nomenclature: numbers 1–100 refer to patient ID, letters A–E refer to samples taken at a single time point, and numbers 0.1–0.3 refer to serial samples from different time points.

**Table S3.** Non-LCH lesions: *BRAF*-V600E status

| Lesion ID | Diagnosis                             | Location  | BRAF | qPCR    |
|-----------|---------------------------------------|-----------|------|---------|
|           |                                       |           |      | % V600E |
| 101A.1    | ECD                                   | BM        | WT   | 0       |
| 102A.1    | ECD                                   | Pituitary | WT   | 0       |
| 103A.1    | JXG (multisystem)                     | Skin      | WT   | 0       |
| 103B.1    | JXG (multisystem)                     | Skin      | WT   | 0       |
| 103C.1    | JXG (multisystem)                     | Skin      | WT   | 0       |
| 104A.1    | JXG (skin limited)                    | Skin      | WT   | 0       |
| 105A.1    | JXG (multisystem)                     | Skin      | WT   | 0       |
| 105B.1    | JXG (multisystem)                     | LN        | WT   | 0       |
| 106A.1    | JXG (multisystem)                     | Skin      | WT   | 0       |
| 107A.1    | RDD                                   | LN        | WT   | 0       |
| 108A.1    | RDD                                   | LN        | WT   | 0       |
| 109A.1    | RDD                                   | LN        | WT   | 0       |
| 110A.1    | RDD                                   | LN        | WT   | 0       |
| 111A.1    | RDD                                   | LN        | WT   | 0       |
| 112A.1    | Nasal polyp                           | Sinus     | WT   | 0       |
| 113A.1    | Lymphoma/HLH                          | Liver     | WT   | 0       |
| 114A.1    | Granuloma                             | Ear       | WT   | 0       |
| 115A.1    | Lymphadenopathy                       | LN        | WT   | 0       |
| 116A.1    | Lymphadenopathy                       | LN        | WT   | 0       |
| 117A.1    | Osteomyelitis ( <i>Bartonella</i> )   | Vertebra  | WT   | 0       |
| 117B.1    | Lymphadenopathy ( <i>Bartonella</i> ) | LN        | WT   | 0       |
| 118A.1    | Dermoid cyst                          | Skull     | WT   | 0       |
| 119A.1    | Chronic inflammation                  | Skull     | WT   | 0       |
| 120A.1    | Fibrous dysplasia                     | Skull     | WT   | 0       |
| 121A.1    | Chondrosarcoma                        | Rib       | WT   | 0       |
| 122A.1    | Vascular malformation                 | Skull     | WT   | 0       |
| 123A.1    | Vascular malformation                 | Skull     | WT   | 0       |
| 124A.1    | Vascular malformation                 | Skull     | WT   | 0       |

**Table S4.** LCH peripheral blood analysis: detectable *BRAF-V600E* in circulating cells and disease activity

| Sample ID | Days from diagnosis | Sample type | <i>BRAF</i> status | Extent     | Risk category | Clinically detectable active disease | qPCR           |
|-----------|---------------------|-------------|--------------------|------------|---------------|--------------------------------------|----------------|
|           |                     |             |                    |            |               |                                      | % <i>V600E</i> |
| LCH3.1    | 280                 | pWBC        | V600E              | Multifocal | High          | Yes                                  | 0.27           |
| LCH3.2    | 850                 | pWBC        | V600E              | Multifocal | High          | No                                   | 0.00           |
| LCH3.3    | 1,113               | pWBC        | V600E              | Multifocal | High          | No                                   | 0.00           |
| LCH8.1    | 16                  | pWBC        | V600E              | Multifocal | Low           | Yes                                  | 0.09           |
| LCH8.2    | 560                 | pWBC        | V600E              | Multifocal | Low           | No                                   | 0.00           |
| LCH8.3    | 914                 | pWBC        | V600E              | Multifocal | Low           | No                                   | 0.00           |
| LCH9.1    | 16                  | pWBC        | V600E              | Multifocal | High          | Yes                                  | 0.23           |
| LCH9.2    | 97                  | pWBC        | V600E              | Multifocal | High          | Yes                                  | 0.23           |
| LCH9.3    | 607                 | pWBC        | V600E              | Multifocal | High          | No                                   | 0.00           |
| LCH14.1   | 612                 | pWBC        | V600E              | Multifocal | High          | Yes                                  | 0.75           |
| LCH18.1   | 686                 | pWBC        | V600E              | Multifocal | High          | Yes                                  | 2.17           |
| LCH20.1   | 1                   | pWBC        | V600E              | Multifocal | High          | Yes                                  | 0.88           |
| LCH21.1   | 2                   | pWBC        | V600E              | Multifocal | Low           | Yes                                  | 0.11           |
| LCH23.1   | 0                   | pWBC        | V600E              | Multifocal | Low           | Yes                                  | 0.07           |
| LCH30.1   | 30                  | pWBC        | V600E              | Multifocal | High          | Yes                                  | 0.02           |
| LCH30.2   | 114                 | pWBC        | V600E              | Multifocal | High          | Yes                                  | 0.07           |
| LCH30.3   | 903                 | pWBC        | V600E              | Multifocal | High          | Yes                                  | 0.00           |
| LCH30.4   | 966                 | pWBC        | V600E              | Multifocal | High          | No                                   | 0.00           |
| LCH30.5   | 1,638               | pWBC        | V600E              | Multifocal | High          | No                                   | 0.00           |
| LCH40.1   | 261                 | pWBC        | V600E              | Multifocal | High          | Yes                                  | 0.10           |
| LCH40.2   | 678                 | pWBC        | V600E              | Multifocal | High          | Yes                                  | 0.30           |
| LCH67.1   | 25                  | pWBC        | V600E              | Multifocal | High          | Yes                                  | 1.11           |
| LCH67.2   | 65                  | pWBC        | V600E              | Multifocal | High          | Yes                                  | 0.15           |
| LCH67.3   | 128                 | pWBC        | V600E              | Multifocal | High          | Yes                                  | 0.18           |
| LCH67.4   | 352                 | pWBC        | V600E              | Multifocal | High          | Yes                                  | 0.06           |
| LCH67.5   | 716                 | pWBC        | V600E              | Multifocal | High          | No                                   | 0.00           |
| LCH68.1   | 14                  | pWBC        | V600E              | Multifocal | Low           | Yes                                  | 1.15           |
| LCH68.2   | 208                 | pWBC        | V600E              | Multifocal | Low           | Yes                                  | 0.71           |
| LCH68.3   | 401                 | pWBC        | V600E              | Multifocal | Low           | Yes                                  | 0.10           |
| LCH68.4   | 687                 | pWBC        | V600E              | Multifocal | Low           | No                                   | 0.00           |
| LCH70.1   | 27                  | pWBC        | V600E              | Multifocal | High          | Yes                                  | 0.04           |
| LCH70.2   | 216                 | pWBC        | V600E              | Multifocal | High          | No                                   | 0.00           |
| LCH70.3   | 300                 | pWBC        | V600E              | Multifocal | High          | No                                   | 0.00           |
| LCH70.4   | 566                 | pWBC        | V600E              | Multifocal | High          | No                                   | 0.00           |
| LCH75.1   | 4                   | pWBC        | V600E              | Multifocal | High          | Yes                                  | 0.16           |
| LCH75.2   | 116                 | pWBC        | V600E              | Multifocal | High          | Yes                                  | 0.13           |
| LCH75.3   | 500                 | pWBC        | V600E              | Multifocal | High          | No                                   | 0.00           |
| LCH77.1   | – 18                | pWBC        | V600E              | Multifocal | High          | Yes                                  | 0.09           |
| LCH77.2   | 38                  | pWBC        | V600E              | Multifocal | High          | Yes                                  | 0.08           |
| LCH77.3   | 349                 | pWBC        | V600E              | Multifocal | High          | No                                   | 0.00           |
| LCH80.1   | 127                 | pWBC        | V600E              | Multifocal | High          | Yes                                  | 0.02           |
| LCH80.2   | 354                 | pWBC        | V600E              | Multifocal | High          | Yes                                  | 0.03           |
| LCH99.1   | 9                   | pWBC        | V600E              | Multifocal | High          | Yes                                  | 0.02           |
| LCH99.2   | 179                 | pWBC        | V600E              | Multifocal | High          | Yes                                  | 0.11           |



**Table S5.** LCH BM aspirate analysis: detectable *BRAF-V600E* and disease activity

| Sample ID   | Days from diagnosis | Sample type | BRAF  | Disease status                     | BRAFV600E | Pathology report |
|-------------|---------------------|-------------|-------|------------------------------------|-----------|------------------|
|             |                     |             |       |                                    | %         |                  |
| LCH009      | 170                 | BM          | V600E | Refractory                         | 1.0       | No LCH           |
| LCH040      | 959                 | BM          | V600E | Refractory                         | 0.10      | LCH              |
| LCH067      | 0                   | BM          | V600E | Diagnosis                          | 2.12      | LCH              |
| LCH067      | 96                  | BM          | V600E | Mixed response                     | 0.15      | LCH              |
| LCH067      | 127                 | BM          | V600E | Mixed response                     | 0.02      | LCH              |
| LCH068      | 14                  | BM          | V600E | Diagnosis                          | 2.17      | No LCH           |
| LCH068      | 61                  | BM          | V600E | Mixed response                     | 1.08      | No LCH           |
| LCH070      | 31                  | BM          | V600E | Diagnosis                          | 0.11      | No LCH           |
| LCH075      | -275                | Cord blood  | V600E | Cord blood – no known LCH at birth | 0.00      | N/A              |
| LCH075      | 8                   | BM          | V600E | Diagnosis                          | 0.15      | No LCH           |
| LCH075      | 116                 | BM          | V600E | Refractory                         | 0.08      | No LCH           |
| LCH-JXG-099 | 7                   | BM          | V600E | Diagnosis                          | 0.40      | JXG              |
| LCH-JXG-099 | 53                  | BM          | V600E | Mixed response                     | 0.03      | JXG              |
| LCH-JXG-099 | 87                  | BM          | V600E | No evidence of disease             | 0.00      | No LCH or JXG    |
